# Supplementary material for: In-classroom physical activity breaks program among school children in Sri Lanka: study protocol for a randomized controlled trial
Source: Frontiers journal article supplement (doi:10.3389/fpubh.2024.1360210), 2024-04-22
Supplement: Data_Sheet_3.PDF [file Data_Sheet_3.PDF]

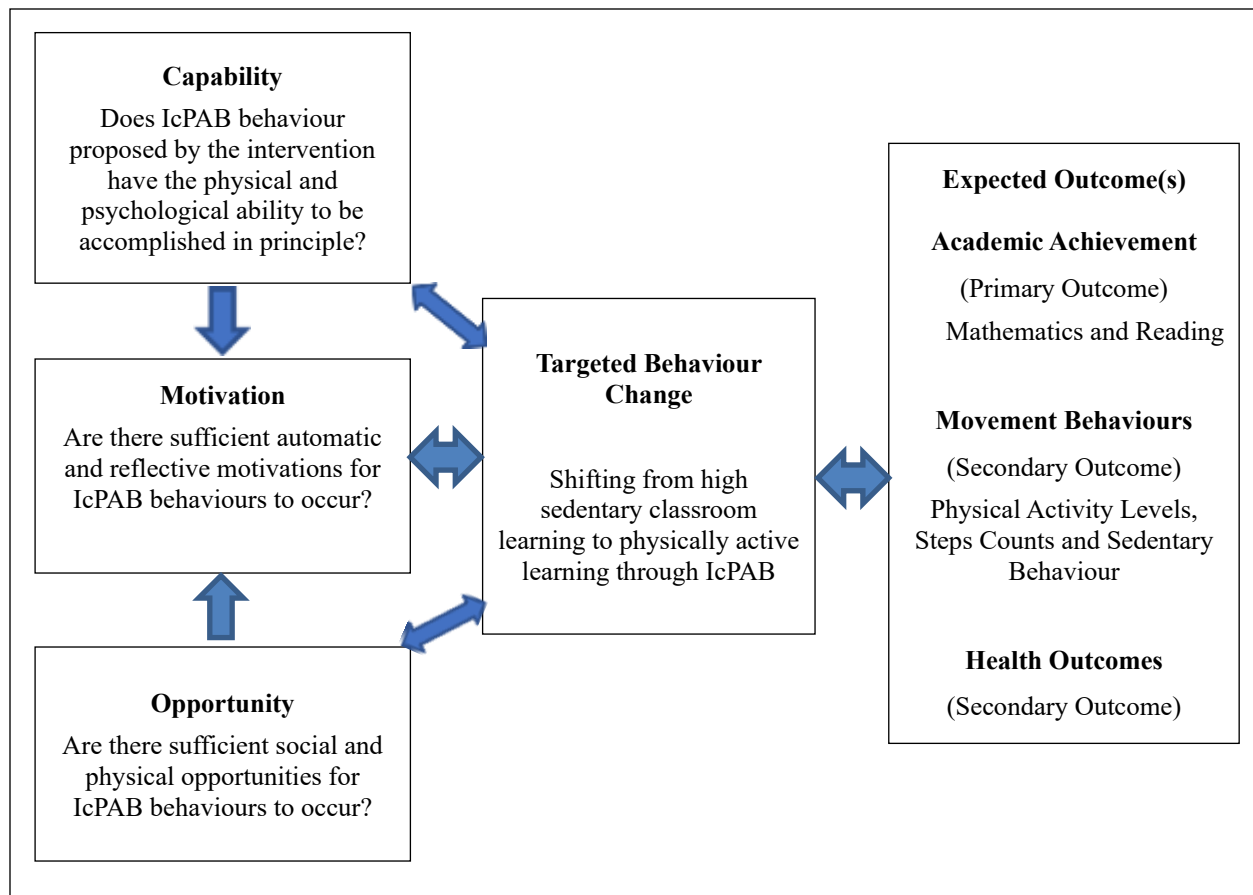

*Supplementary Figure. Mapping the COM-B Model onto intervention concept (Adapted [1,2])*

1. Brierley ML, Smith LR, Bailey DP, Every SA, Staines TA, Chater AM. Perceived influences on reducing prolonged sitting in police staff: a qualitative investigation using the Theoretical Domains Framework and COM-B model. BMC Public Health [Internet]. 2021 Dec 19 [cited 2022 Aug 29];21(1):2126. Available from: <https://link.springer.com/articles/10.1186/s12889-021-12019-6>
2. Ojo SO, Bailey DP, Brierley ML, Hewson DJ, Chater AM. Breaking barriers: using the behavior change wheel to develop a tailored intervention to overcome workplace inhibitors to breaking up sitting time. BMC Public Health [Internet]. 2019 Dec 16 [cited 2021 Nov 2];19(1):1126. Available from: <https://bmcpublikealth.biomedcentral.com/articles/10.1186/s12889-019-7468-8>

*Supplementary Table. Specific procedure of development and implementation of the IC-PAB intervention*

| Targets                                                                                                                               | Who           | Where                                                 | When                           | How often                                           | With/From/To whom                                             |
|---------------------------------------------------------------------------------------------------------------------------------------|---------------|-------------------------------------------------------|--------------------------------|-----------------------------------------------------|---------------------------------------------------------------|
| Obtain information about the capability, the desire of the facilitators, and opportunities to implement an IcPAB intervention in SL   | Research Team | At the field locations where interviews are conducted | During pre-intervention stage  | Once from each key informant                        | Key informants such as teachers, section heads and principals |
| Develop IcPAB                                                                                                                         |               | Workstations                                          |                                | Number of modifications until an agreement was made | Teachers                                                      |
| Share evidence-based information on the benefits of IcPAB                                                                             |               | At schools                                            |                                | Once                                                | Principals                                                    |
| Enrolling and randomizing the schools                                                                                                 |               | Workstations                                          |                                |                                                     | An independent randomizer                                     |
| Obtaining consents                                                                                                                    |               | At school                                             |                                |                                                     | Parents/ guardians                                            |
| Share evidence-based information on the benefits of IcPAB                                                                             |               | At teacher training location                          |                                |                                                     | IcPAB facilitators (Teachers)                                 |
|                                                                                                                                       |               | At IcPAB intervention venue                           |                                |                                                     |                                                               |
| Delivering intervention manual                                                                                                        |               | At teacher training location                          |                                | Once                                                | Students                                                      |
| IcPAB training                                                                                                                        |               |                                                       |                                |                                                     |                                                               |
| Obtain baseline measurements                                                                                                          | At school     | During the intervention: baseline                     |                                |                                                     |                                                               |
| Delivering IcPAB intervention                                                                                                         | Teachers      | At IcPAB intervention venue                           | During the intervention period | 12 weeks                                            | Students (Intervention Group)                                 |
| Obtain mid-intervention measurements                                                                                                  | Research Team | At school                                             | During the mid-intervention:   | Once                                                | Students                                                      |
| Obtain end-intervention measurements                                                                                                  |               |                                                       | During the end-intervention:   |                                                     |                                                               |
| Obtain information about the capability, the desire of the facilitators, and opportunities to implement an IcPAB intervention further |               | At the field locations where                          | At the end of the intervention | Once from each key informant                        | Students and teachers                                         |

|  |  |                             |  |  |                         |
|--|--|-----------------------------|--|--|-------------------------|
|  |  | interviews are<br>conducted |  |  | (Intervention<br>Group) |
|--|--|-----------------------------|--|--|-------------------------|
